# Supplementary material for: Interval training suppresses nod-like receptor protein 3 inflammasome activation to improve cardiac function in myocardial infarction rats by hindering the activation of the transforming growth factor-β1 pathway
Source: Springer Nature journal article supplement (doi:10.1186/s13019-024-02756-1), 2024-05-10

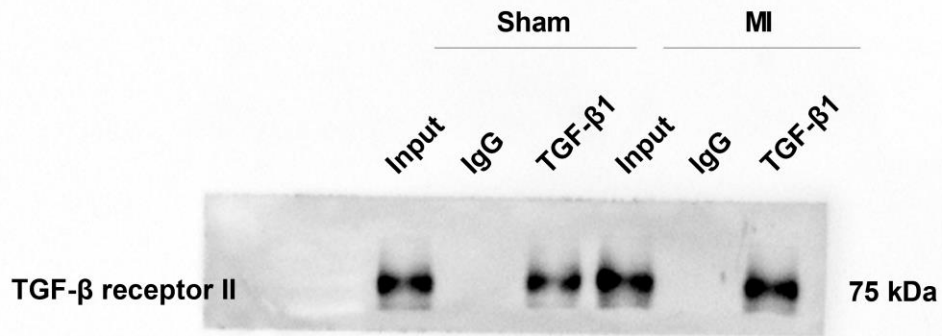

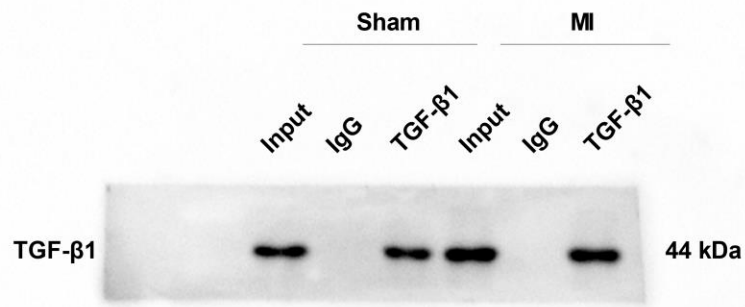

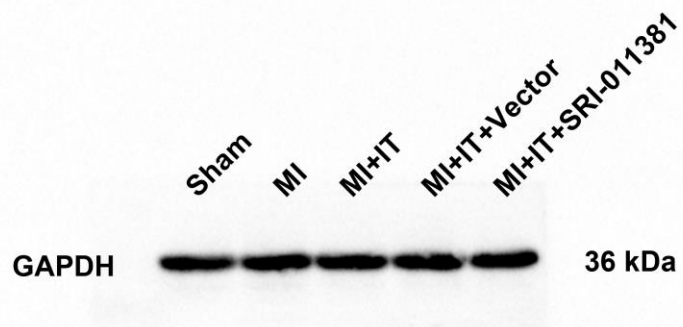

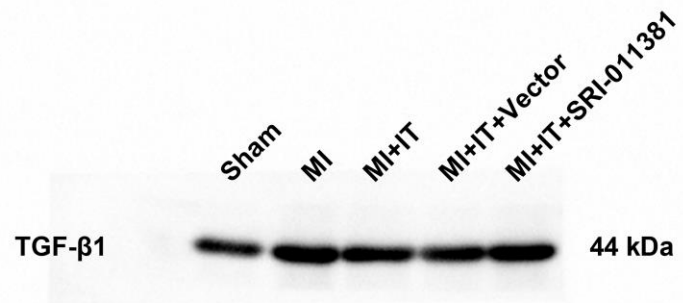

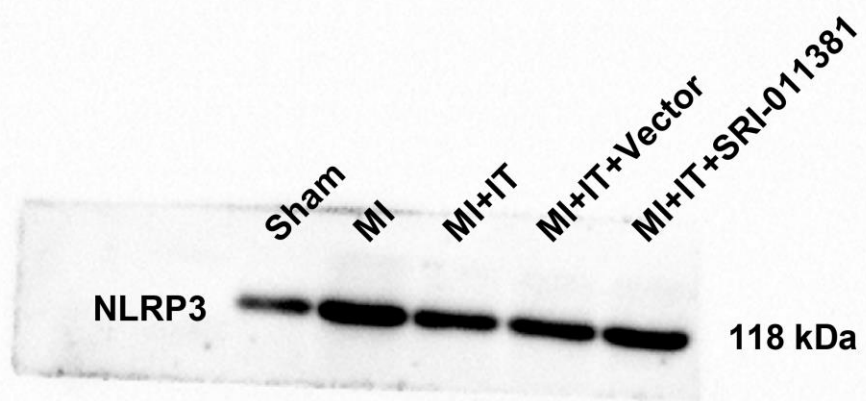

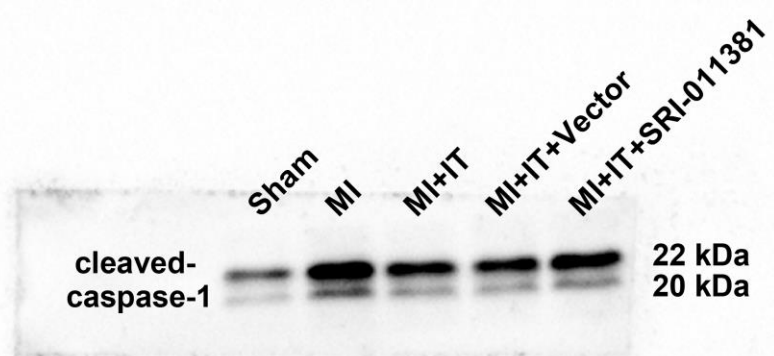

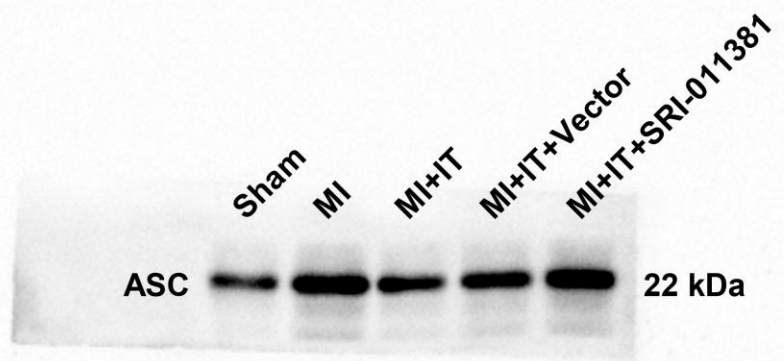

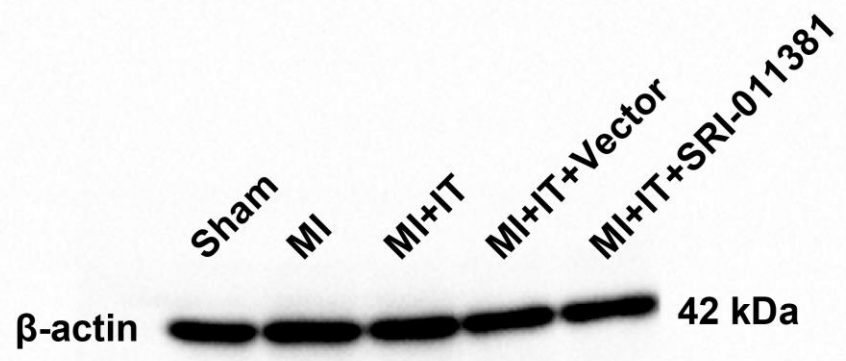



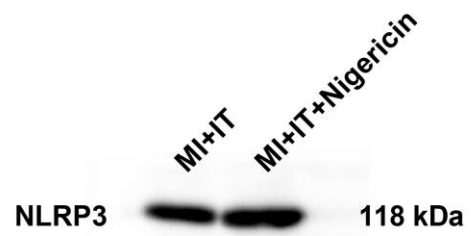

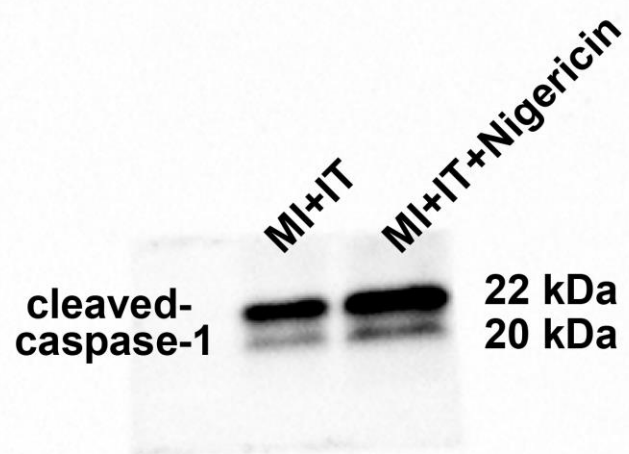

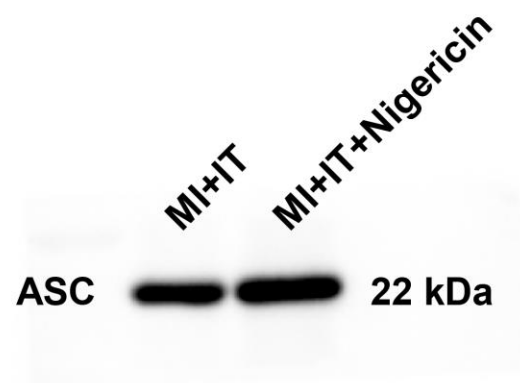

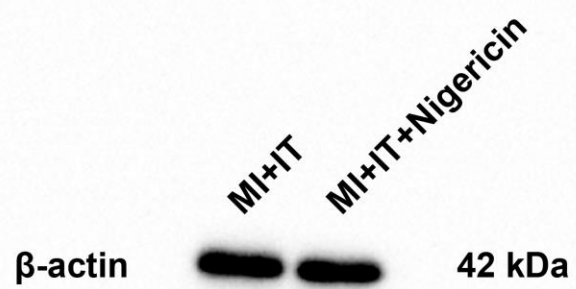

Supplement: MOESM2 [file 27076648]
